# Supplementary material for: Mannose-Coated Reconstituted Lipoprotein Nanoparticles for the Targeting of Tumor-Associated Macrophages: Optimization, Characterization, and In Vitro Evaluation of Effectiveness
Source: MDPI journal article supplement (doi:10.3390/pharmaceutics15061685), 2023-06-08
Supplement: s1 [file s1]

Supplementary Materials

# Mannose-Coated Reconstituted Lipoprotein Nanoparticles for the Targeting of Tumor-Associated Macrophages: Optimization, Characterization, and In Vitro Evaluation of Effectiveness

Akpedje S. Dossou <sup>1</sup>, Morgan E. Mantsch <sup>2</sup>, Ammar Kapic <sup>1</sup>, William L. Burnett <sup>3</sup>, Nirupama Sabnis <sup>1</sup>, Jeffery L. Coffey <sup>3</sup>, Rance E. Berg <sup>1</sup>, Rafal Fudala <sup>1,†</sup> and Andras G. Lacko <sup>1,\*</sup>

<sup>1</sup> Department of Microbiology, Immunology and Genetics, UNT Health Science Center (UNTHSC), Fort Worth, TX 76107, USA; akpedjedossou@my.unthsc.edu (A.S.D.); ammarkapic@my.unthsc.edu (A.K.); nirupama.sabnis@unthsc.edu (N.S.); rance.berg@unthsc.edu (R.E.B.)

<sup>2</sup> College of Natural Sciences, University of Texas at Austin, Austin, TX 78705, USA; morgan.mantsch@austin.utexas.edu

<sup>3</sup> College of Science and Engineering, Texas Christian University (TCU), Fort Worth, TX 76129, USA; w.l.burnett@tcu.edu (W.L.B.); j.coffey@tcu.edu (J.L.C.)

\* Correspondence: andras.lacko@unthsc.edu

† Deceased.

**Table S1.** Characterization of the different formulations of the rHDL-DPM-DMXAA NPs.

| Formulations of DMXAA | Particle Size (nm) | Polydispersity Index | Zeta Potential (mV) | %EE        | Particle Concentration (particles/mL) |
|-----------------------|--------------------|----------------------|---------------------|------------|---------------------------------------|
| No DPM                | 49.5 ± 3.9         | 0.189 ± 0.030        | -20.2 ± 3.9         | 3.3 ± 0.7  | 8.5E14 ± 2.9E14                       |
| 1:200                 | 69.9 ± 8.3         | 0.170 ± 0.045        | -30.1 ± 4.7         | 62.6 ± 8.1 | 4.9E14 ± 1.7E14                       |
| 1:100                 | 107.3 ± 31.6       | 0.177 ± 0.015        | -29.0 ± 4.5         | 66.8 ± 6.6 | 6.5E14 ± 2.5E14                       |
| 1:50                  | 131.7 ± 30.9       | 0.167 ± 0.010        | -36.5 ± 3.6         | 74.4 ± 7.2 | 5.6E14 ± 9.7E13                       |
| 1:25                  | 129.6 ± 30.7       | 0.182 ± 0.012        | -24.8 ± 2.2         | 70.2 ± 8.2 | 8.3E14 ± 3.5E14                       |
